# Supplementary material for: CCAAT/Enhancer-Binding Protein β Mediates Oxygen-Induced Retinal Neovascularization via Retinal Vascular Damage and Vascular Endothelial Growth Factor
Source: Hindawi journal article supplement (doi:10.1155/2020/2789209), 2020-03-09
Supplement: f1 [file 2789209.f1.pdf]

## Materials and Methods

The sequences of three *shC/EBP β*. The recombinant *C/EBP β* shRNA (shRNA-1: ACAAGCTGAGCGACGAGTACA, shRNA-2: CATGGAAGTGGCCAACTTCTA, shRNA-3: CACGCTGCGGAACTTGTTCAA) and the scrambled shRNA were designed and packaged by Genechem Co., Ltd (Shanghai, China).

## FIGURE CAPTIONS

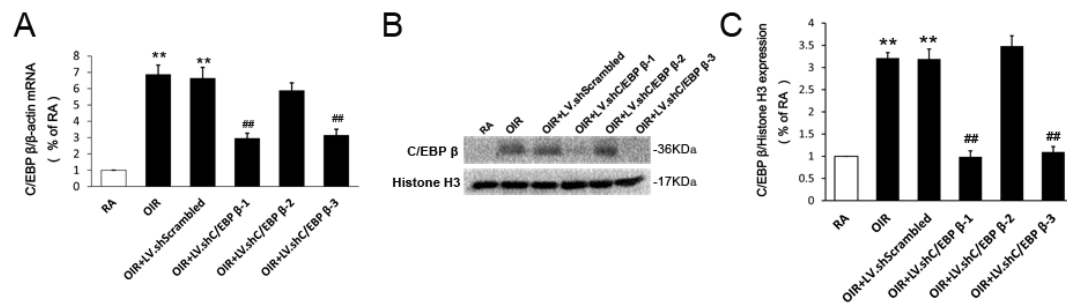

Supplemental Figure 1. *C/EBP β* expression in rat retinas and lentiviral particle transduction. (A) Expression of *C/EBP β* mRNA (as determined by RT-PCR). (B) Expression of *C/EBP β* protein (as determined by Western blot). (C) Quantitative analysis of the Western blot signal density. Each column denotes the mean  $\pm$ SD (n=3). \*\* $P$ <0.01 versus rats in the RA group. ## $P$ <0.01 versus rats in the LV.shScrambled group.
